# Supplementary material
Source: publisher figshare collection journal article supplement (https://rs.figshare.com/ndownloader/files/14111606)
Supplement: Supplementary file 1 [file 14111606]

## Sheet: Sheet1
Droplet radii and their normalzied frequency in the samples solidified under uniform magnetic fields
B			B			B			B			B
1 T			2 T			3 T			4 T			5 T
ln r (mm)	Frequency (-)		ln r (mm)	Frequency (-)		ln r (mm)	Frequency (-)		ln r (mm)	Frequency (-)		ln r (mm)	Frequency (-)
1.2	0		0.6	0		1.2	0		0.9	0		1.8	0
1.5	0.00649351		0.9	0.0070922		1.5	0.0666667		1.2	0.030303		2.1	0.0526316
1.8	0.0584416		1.2	0.0567376		1.8	0.233333		1.5	0.121212		2.4	0.263158
2.1	0.409091		1.5	0.191489		2.1	0.133333		1.8	0.242424		2.7	0.368421
2.4	0.227273		1.8	0.269504		2.4	0.333333		2.1	0.287879		3	0.421053
2.7	0.123377		2.1	0.205674		2.7	0.133333		2.4	0.121212		3.3	0.157895
3	0.0779221		2.4	0.070922		3	0.0333333		2.7	0.0757576		3.6	0.0526316
3.3	0.0519481		2.7	0.0567376		3.3	0		3	0.0454545		3.9	0.105263
3.6	0.0194805		3	0.0496454		3.6	0		3.3	0		4.2	0.0526316
3.9	0.012987		3.3	0.0141844		3.9	0		3.6	0.0151515		4.5	0
4.2	0		3.6	0.035461		4.2	0		3.9	0		4.8	0.0526316
4.5	0.012987		3.9	0.0070922		4.5	0		4.2	0.0151515		5.1	0.0526316
4.8	0		4.2	0.0212766		4.8	0.0333333		4.5	0		5.4	0.0526316
			4.5	0.0070922		5.1	0		4.8	0		5.7	0
			4.8	0		5.4	0.0333333		5.1	0		6	0.0526316
			5.1	0		5.7	0		5.4	0		6.3	0
			5.4	0					5.7	0.0151515
			5.7	0					6	0.0151515
			6	0					6.3	0.0151515
			6.3	0					6.6	0
			6.6	0
			6.9	0
			7.2	0.0070922
			7.5	0
Droplet radii and their normalzied frequency in the samples solidified under non-uniform magnetic fields of negative gradients
BdB/dz			BdB/dz			BdB/dz			BdB/dz			BdB/dz			BdB/dz
_-2.26 T^2/m			_-9.05 T^2/m			_-20.4 T^2/m			_-36.2 T^2/m			_-56.5 T^2/m			_-81.4 T^2/m
ln r (mm)	Frequency (-)		ln r (mm)	Frequency (-)		ln r (mm)	Frequency (-)		ln r (mm)	Frequency (-)		ln r (mm)	Frequency (-)		ln r (mm)	Frequency (-)
1.2	0		0.9	0		0.9	0		1.2	0		1.2	0		1.2	0
1.5	0.0123457		1.2	0.0465116		1.2	0.0632911		1.5	0.173913		1.5	0.15493		1.5	0.0483871
1.8	0.17284		1.5	0.232558		1.5	0.139241		1.8	0.376812		1.8	0.169014		1.8	0.306452
2.1	0.283951		1.8	0.406977		1.8	0.316456		2.1	0.231884		2.1	0.140845		2.1	0.225806
2.4	0.148148		2.1	0.174419		2.1	0.202532		2.4	0.101449		2.4	0.126761		2.4	0.209677
2.7	0.160494		2.4	0.0813953		2.4	0.0632911		2.7	0.0869565		2.7	0.126761		2.7	0.0806452
3	0.0493827		2.7	0.0465116		2.7	0.0379747		3	0		3	0.0422535		3	0.0322581
3.3	0.0740741		3	0		3	0.0506329		3.3	0		3.3	0.0985915		3.3	0.0322581
3.6	0.037037		3.3	0		3.3	0.0253165		3.6	0		3.6	0.028169		3.6	0.016129
3.9	0.0123457		3.6	0		3.6	0.0379747		3.9	0		3.9	0.0140845		3.9	0
4.2	0.0246914		3.9	0		3.9	0		4.2	0		4.2	0.0704225		4.2	0
4.5	0.0246914		4.2	0		4.2	0.0126582		4.5	0		4.5	0.0140845		4.5	0
4.8	0		4.5	0		4.5	0		4.8	0		4.8	0		4.8	0
			4.8	0		4.8	0.0126582		5.1	0.0144928		5.1	0		5.1	0.016129
			5.1	0		5.1	0.0126582		5.4	0.0144928		5.4	0.0140845		5.4	0.016129
			5.4	0		5.4	0		5.7	0		5.7	0		5.7	0.016129
			5.7	0		5.7	0.0126582								6	0
			6	0.0116279		6	0.0126582
			6.3	0		6.3	0
Droplet radii and their normalzied frequency in the samples solidified under non-uniform magnetic fields of positive gradients
BdB/dz			BdB/dz			BdB/dz			BdB/dz
_2.26 T^2/m			_9.05 T^2/m			_20.4 T^2/m			_36.2 T^2/m
ln r (mm)	Frequency (-)		ln r (mm)	Frequency (-)		ln r (mm)	Frequency (-)		ln r (mm)	Frequency (-)
1.2	0		0.3	0		1.2	0		0.9	0
1.5	0.00581395		0.6	0.00826446		1.5	0.111111		1.2	0.0232558
1.8	0.0988372		0.9	0		1.8	0.311111		1.5	0.147287
2.1	0.389535		1.2	0		2.1	0.177778		1.8	0.155039
2.4	0.273256		1.5	0.0330579		2.4	0.222222		2.1	0.24031
2.7	0.133721		1.8	0.14876		2.7	0		2.4	0.193798
3	0.0348837		2.1	0.239669		3	0.0888889		2.7	0.100775
3.3	0.0290698		2.4	0.198347		3.3	0.0666667		3	0.0620155
3.6	0.00581395		2.7	0.140496		3.6	0.0222222		3.3	0.0697674
3.9	0.0116279		3	0.0991736		3.9	0		3.6	0.00775194
4.2	0.00581395		3.3	0.0826446					3.9	0
4.5	0		3.6	0.00826446
4.8	0		3.9	0
5.1	0		4.2	0.00826446
5.4	0.00581395		4.5	0.00826446
5.7	0		4.8	0
6	0.00581395		5.1	0
6.3	0		5.4	0.0165289
			5.7	0.00826446
			6	0
